1           **Parallel epigenetic modifications induced by hatchery rearing**  
2                                   **in a Pacific Salmon**

3 Jérémy Le Luyer<sup>1,2,Δ</sup> \*, Martin Laporte<sup>1,Δ</sup>, Terry D. Beacham<sup>3</sup>, Karia H. Kaukinen<sup>3</sup>, Ruth E.  
4 Withler<sup>3</sup>, Jong S. Leong<sup>4</sup>, Eric B. Rondeau<sup>4</sup>, Ben F. Koop<sup>4</sup>, Louis Bernatchez<sup>1</sup>

5  
6 <sup>1</sup> Département de Biologie, Institut de Biologie Intégrative et des Systèmes (IBIS), Université Laval, Québec,  
7 Québec, Canada G1V 0A6

8 <sup>2</sup> Centre Ifremer du Pacifique, UMR-241 EIO, Institut français de recherche pour l'exploitation de la mer,  
9 Tahiti, Polynésie française. *Present address*

10 <sup>3</sup> Department of Fisheries and Ocean, Biological Science Branch, Pacific Biological Station, Nanaimo, British  
11 Columbia, Canada V9R 5K6

12 <sup>4</sup> Centre for Biomedical Research, Department of Biology, University of Victoria, Victoria, British Columbia,  
13 Canada V8P 5C2

14  
15 <sup>Δ</sup> First Co-authors

16 Correspondence: \* [jeremy.le.luyer@ifremer.fr](mailto:jeremy.le.luyer@ifremer.fr)

17 Keywords: epigenetics – methylation- Coho Salmon - hatchery - RAD sequencing

18

19

## 20 **Highlights**

21 - First study to highlight parallel epigenetic modifications induced by hatchery rearing as a  
22 potential explanatory mechanism for rapid change in fitness

## 23 **Summary**

24 A puzzling question in conservation biology is how to maintain overall fitness of individuals  
25 bred in captive environment upon release into the wild, especially for rehabilitating  
26 declining or threatened species [1,2]. For salmonid species, a heritable change in fitness  
27 related traits and gene expression has been reported to occur in a single generation of  
28 captivity in hatchery environment [3–5]. Such rapid changes are congruent with models of  
29 inadvertent domestication selection which may lead to maladaptation in the natural  
30 environment [4]. Arguably, the underlying mechanism by which captivity may induce  
31 fitness difference between wild and captive congeners is still poorly understood. Short-  
32 term selection on complex phenotypic traits is expected to induce subtle changes in allele  
33 frequency over multiple loci [7–9]. Yet, most studies investigating the molecular basis for  
34 rapid change in fitness related traits occurring in hatchery have concentrated their effort on  
35 finding evidence for selection at the genome level by identifying loci with large effect.

36 Numerous wild stocks of Pacific anadromous salmon and trout (genus *Oncorhynchus*  
37 and *Salmo*) have experienced fluctuating abundance over the past century, with a series of  
38 sharp declines [6–8]. With the objectives of preserving ecosystem integrity, enhancing

39 declining populations and sustaining fisheries, conservation hatcheries have been  
40 flourishing. This is particularly true along the North American Pacific coast where billions of  
41 salmonids, all species included, are released each year. Despite substantial improvement of  
42 production management, the beneficial ecological role of hatcheries in enhancing and  
43 restoring wild stocks is still debated, mainly because of the reduced fitness and  
44 maladaptation of hatchery-fish when released in the wild [3,5,9]. Although previous studies  
45 showed that domestication selection was involved in such fitness impairment, they also  
46 observed that different environmental conditions (e.g. reduced fish density) significantly  
47 modulated the physiological acclimation to hatchery environment [4].

48         Environmental stimuli are especially relevant during early embryonic development,  
49 which also correspond to a sensitive methylation reprogramming window in vertebrates  
50 [10,11]. It is therefore plausible that differences in rearing environment during early  
51 development may result in epigenetic modifications that could in turn impact on fitness.  
52 However, the only epigenetic study to date pertaining to captive rearing in salmonids and  
53 performed using methylation-sensitive amplified fragments (MSAP) failed to identify  
54 significant changes in methylation profile associated with hatchery rearing [12]

55         Here, we used a higher resolution approach to compare the genome-wide pattern of  
56 methylation in hatchery-reared juvenile (smolt) Coho Salmon with that of their wild  
57 counterparts in two geographically distant rivers in British Columbia, Canada. Using a  
58 reduced representation bisulfite sequencing (RRBS) approach covering an average per  
59 individual of about 70 million cytosines in CpG context, we identified 100 methylated

60 regions (DMRs) that differed in parallel between hatchery and natural origin salmon in both  
61 rivers. The total variance of epigenetic variation among individuals explained by river or  
62 origin and rearing environment in a RDA model was 16% (adj.R<sup>2</sup>=0.16), and both variables  
63 equally explained about 8% of the variance after controlling for each other. The gene  
64 ontology analysis revealed that regions with different methylation levels between hatchery  
65 and natural origin salmon showed enrichment for ion homeostasis, synaptic and  
66 neuromuscular regulation, immune and stress response, and control of locomotion  
67 functions. We further identified 15,044 SNPs that allowed detection of significant  
68 differences between either rivers or sexes. However, no effect of rearing environment was  
69 observed, confirming that hatchery and natural origin fish of a given river belong to the  
70 same panmictic population, as expected based on the hatchery programs applied in these  
71 rivers (see Supplementary experimental procedures). Moreover, neither a standard  
72 genome-scan approach nor a polygenic statistical framework allowed detection of selective  
73 effects within a single generation between hatchery and natural origin salmon. Therefore,  
74 this is the first study to demonstrate that parallel epigenetic modifications induced by  
75 hatchery rearing during early development may represent a potential explanatory  
76 mechanism for rapid change in fitness-related traits previously reported in salmonids.

77

## 78 **Results**

### 79 **Sampling**

80 We collected a total of 40 Coho Salmon from two rivers in British Columbia, Canada; the  
81 Capilano and Quinsam Rivers (Table S1, Figure S1). These systems are well suited to test  
82 specifically for the effect of rearing environment on patterns of methylation, independent of  
83 the genetic background between fish born in the wild (thereafter natural origin) vs. those  
84 born in hatchery (see Supplementary experimental procedures). During their downstream  
85 migration to the sea, we collected from each river 10 juveniles (smolt stage) reared in  
86 captivity in a local hatchery (fin-clipped; hereafter “hatchery origin”) and 10 smolts born in  
87 the wild (hereafter “natural origin”). Broodstock for the hatchery fish was collected while  
88 returning to spawn in the same year in both rivers. The number of returning adults sampled  
89 and used for breeding was 758 and 894 for the Capilano River and Quinsam River  
90 populations, respectively. The broodstock included 3 years old females, as well as 2-3 years  
91 old males and could represent fish born previously either in hatchery or in the wild.

### 92 **Evidence for parallel epigenetic modifications in hatchery environment**

93 We used a Reduced Representation Bisulfite Sequencing (RRBS) approach, with the *MspI*  
94 restriction enzyme, to document both genome-wide methylation and genetic variation. In  
95 order to avoid the possibility of falsely interpreting existing C-T DNA polymorphism as  
96 epigenetic variation, we first masked the genome (GenBank assembly accession:

97 GCA\_002021735.1) by removing all C>T polymorphism (1,896,050 SNPs; maf=0.05) found  
98 by whole-genome re-sequencing of 20 fish from British Columbia (Supplementary  
99 experimental procedures; Figure S1). We used a tiling window approach to quantify the  
100 percentage of methylation over 1000-bp regions throughout the masked genome and  
101 retained only cytosines in a CpG context for downstream analyses, as these regions  
102 represent the responsive methylation context in vertebrates (Supplementary experimental  
103 procedures). We used a db-RDA to document methylation variation among hatchery and  
104 natural origin fish from both rivers. We first produced a principal coordinate analysis  
105 (PCoA) on a Euclidean distance matrix computed using all the raw data and kept axes  
106 according to the cumulative broken-stick threshold, which correspond to six axes  
107 explaining at least 2.75% of the variance for a total of 42.2% of the variance [13]. A  
108 distance-based redundancy analysis (db-RDA) was then produced on the epigenetic  
109 variation explained by these PCoA factors (response matrix) with river of origin, rearing  
110 environment and sex as explanatory variables. The model was significant with an adjusted  
111  $R^2$  of 0.16 (Figure 1). Both river of origin and rearing environment were significant whereas  
112 no significant effect was detected for sex (Figure 1). Partial db-RDAs revealed that the net  
113 variation explained by rearing environment (adj. $R^2$ =0.08;  $F$ =4.34;  $p$ -value<0.05) was  
114 identical to the one explained by the river of origin (adj. $R^2$ =0.08;  $F$ =4.66;  $p$ -value<0.01).  
115 This shared variation between hatchery origin salmon from both rivers relative to their  
116 natural origin congeners provides evidence for similar (parallel) epigenetic modifications  
117 induced by hatchery rearing.

118           Moreover, we identified differentially methylated regions (defined as having >15%  
119 overall difference; q-value < 0.001; see Supplementary experimental procedures) between  
120 rearing environments, using a logistic regression with river of origin as covariates. We  
121 identified a total of 100 DMRs that were distributed among 27 chromosomes and 20  
122 unmapped scaffolds (Figure 2). The proportion of hypermethylated DMRs was much  
123 greater in hatchery origin relative to natural origin salmon (89 vs 11;  $\chi^2=60.84$ , df=1,  
124  $P<0.001$ ), pointing to a general pattern of downregulation of genes associated with these  
125 DMRs in hatchery origin salmon.

#### 126 **Functional annotation and gene ontology of DMRs**

127 We mapped the recently published transcriptome of the Coho Salmon [14] to the species'  
128 draft genome (see Supplemental files for details) to infer functional annotation of DMRs.  
129 Out of the 100 DMRs, we identified 37 DMRs overlapping 52 unique transcripts and regions  
130 comprising 5kb up and downstream of these transcripts. A blastx approach successfully  
131 identified 29 unique Uniprot IDs and again revealed an excess of hypermethylation in  
132 hatchery relative to wild fish (25 hypermethylated vs. 4 hypomethylated;  $\chi^2=15.21$ , df=1,  
133  $P<0.001$ ; Figure 2; Table 1). Gene ontology (GO) analysis revealed an over-representation  
134 (p-value<0.05 and at least three genes by GO term) of modules associated with ion  
135 homeostasis (GO:0055080: cation homeostasis, GO:0042592: homeostatic process,  
136 GO:0043167: ion binding, GO:0055065: metal ion homeostasis). It has been shown  
137 previously in a closely related species (Rainbow Trout, *Oncorhynchus mykiss*) that hatchery-  
138 rearing negatively affects acclimation to seawater as reflected by lower specific activity of

139 NA<sup>+</sup> K<sup>+</sup> ATPase and lower survival following seawater transfer [15]. We also observed a  
140 significant enrichment for functions associated with the immune response (GO:0031347:  
141 regulation of defense response, GO:0050727: regulation of inflammatory response,  
142 GO:0045321: leukocyte activation), as well as synaptic signal modulation and locomotion  
143 functions (GO:0099572: postsynaptic specialization, GO:0050885: neuromuscular process  
144 controlling balance). The neuromuscular process controlling balance includes the  
145 calcium/calmodulin-dependent protein kinase type II subunit beta (CAMK2B),  
146 hypermethylated in hatchery fish, which is a main actor of the neuromuscular  
147 communication and regulating Ca<sup>2+</sup> signalling in skeletal muscle tissue [16]. Its activation  
148 has also been associated, together with the Ca<sup>2+</sup> signalling, to sustained and endurance  
149 muscle exercise in humans and the control of muscle development and excitation [17,18].  
150 Lower critical swimming performance (*Uct*) has been documented in hatchery-reared Coho  
151 Salmon compared to their wild counterparts following transfer to seawater, and lower  
152 average swimming speed has been documented between wild and F1-hatchery Atlantic  
153 Salmon (*Salmo salar*) and Brown trout (*Salmo trutta*) smolts [19,20]. Moreover, the  
154 serotonin receptor 2C (HTR2C), which regulates appetite and feeding behavior, was also  
155 hypermethylated in hatchery fish [21]. Finally, we observed a GO enrichment for  
156 transcription factors (GO:0006357: regulation of transcription from RNA polymerase II  
157 promoter) which comprised the TATA-binding protein-associated factor 172, also  
158 hypermethylated in hatchery-origin fish, which is involved in the global transcription  
159 regulation. Genes under TATA box regulation are more able to respond rapidly (within a



160 single generation) to environmental stress, show more variability in their expression range  
161 (phenotypic plasticity) compared to non-TATA regulated genes, and account for the  
162 appearance of stress induced phenotypes [22].

### 163 **No evidence for genome-wide differentiation between hatchery and natural origin salmon**

164 We mapped the trimmed reads to the masked draft Coho Salmon genome assembly and  
165 identified 15,044 SNP markers (other than C-T polymorphism) meeting stringent filtering  
166 criteria and spread across the genome. The PCoA was produced on a Euclidean distance  
167 matrix of the 15,044 markers. Because no axis could be selected according to the broken-  
168 stick distribution, we selected all axes explaining at least 2.75% of the variation (10 axes  
169 explaining 33.9% of the variance), as previously performed with epigenetic markers [13]. A  
170 distance-based redundancy analysis (db-RDA) was produced on the genetic variation  
171 explained by these PCoA factors (response matrix) with river of origin, rearing environment  
172 and sex as explaining variables. The model was significant with an adjusted  $R^2$  of 0.18  
173 (Figure 3). Both river of origin and sex were significant, whereas no significant effect was  
174 detected for rearing environment (Figure 3). No significant outlier with a genome-scan  
175 approach (Bayescan v2.0 [23]) was detected between sexes (Figure S2). Moreover, an  
176 AMOVA revealed no significant genome wide difference between rearing environments  
177 within river ( $F_{st}=0.005$  and  $0.002$ , for Capilano River and Quinsam Rivers, respectively;  $p$ -  
178 value $>0.05$ ) while the net difference between rivers was highly significant (mean  $F_{st}=0.038$   
179  $\pm 0.003$ ;  $p$ -value $<0.001$ ; Table S2) [24]. Additionally, heterozygosity and inbreeding values  
180 ( $G_{IS}$ ) were not significantly different between rivers or between hatchery and natural origin

181 fish (Table S3). Lastly, we used both a standard Bayescan genome-scan method for  
182 detecting outliers of large effect [23] and a Random Forest approach accounting for  
183 population structure, which allows detecting signals of polygenic selection. This statistical  
184 framework recently allowed detection of parallel polygenic selection between habitats  
185 within the panmictic North Atlantic eels (*Anguilla sp.*) and associated genetic variation with  
186 migration run timing in Chinook salmon (*Oncorhynchus tshawytscha*) populations [25–27].  
187 No outlier (FDR>0.05) was detected between hatchery and natural origin fish using  
188 Bayescan v2.0 (Figure S3), whereas Random Forest identified 114 covarying markers,  
189 distributed over the 30 chromosomes. We used permutations (n = 1000, Supplementary  
190 experimental procedures) to assess whether a signal of apparent polygenic selection similar  
191 to the one that was detected could be obtained by chance (e.g. due to genetic drift or  
192 sampling error). Permutations reveal that similar pattern of apparent polygenic selection  
193 according to the distributions of the out-of-bag (OOB) errors could indeed be obtained by  
194 chance alone (Figure S4). Altogether population genomics analyses confirmed the  
195 prediction that hatchery and natural origin salmon belong to a single panmictic population  
196 within a given river. Our results cannot rule out that selection within one generation has  
197 caused changes in allele frequency between hatchery and natural origin fish in genome  
198 regions that were not screened. Nevertheless, they indicate that such an effect would be  
199 modest relative to parallel differences observed at the epigenetic level.

200

## 201 **Discussion**

202 The decline of many wild stocks of Pacific salmon encouraged the development of  
203 conservation hatcheries for enhancement. However, the hatchery environment during early  
204 life stages induces significant differences in the biology, physiology and behaviour, and  
205 ultimately in the fitness of hatchery-born fish [28]. Hatchery fish show higher reproductive  
206 success than their wild counterparts in hatchery conditions but lower success when  
207 released in the wild with an accumulative impact over a generation, advocating for  
208 inadvertent domestication effects occurring after a single generation of hatchery rearing  
209 [4,5,28]. Recent work provided evidence for a pronounced difference in gene expression  
210 between wild and hatchery fish after one year of captivity despite no significant differences  
211 at the genome level [3], as also reported between recently domesticated (five generations)  
212 Atlantic Salmon and their wild congeners [29]. However, epigenetic variation was recently  
213 associated with rapid adaptation to different natural environments (salt- vs fresh-water) in  
214 the Threespine Stickleback (*Gasterus aculeatus*) [30]. Here, for the first time, our results  
215 support the hypothesis that epigenetic modifications induced by hatchery rearing may  
216 represent a potential explanatory mechanism for rapid change in fitness related traits  
217 previously reported in salmonids. These similar epigenetic modifications were induced  
218 independently in two genetically distinct populations and in apparent absence of overall  
219 neutral and adaptive variation between hatchery and natural origin fish in these systems.  
220 This demonstrates that rapid epigenetic modifications are induced every generation during  
221 early development in the hatchery environment.

222           Indeed, combining a canonical multivariate approach (db-RDA) and pairwise  $F_{st}$   
223 estimates, we found no significant evidence for genetic differentiation between hatchery  
224 and natural origin salmon, whereas genetic differentiation was highly significant between  
225 rivers systems. These results confirm that hatchery and natural origin fish belong to a single  
226 panmictic population, as predicted based on the hatchery programs applied in these rivers.  
227 These “integrated programs” are based on local populations and involve spawning in  
228 hatchery and natural environments. Hatchery and natural origin fish in each river are not  
229 kept separate, thus hatchery origin fish spawn in both the hatchery and the natural habitat  
230 as do natural origin fish, which can maintain high gene flow in the whole system.

231           Furthermore, no difference in genetic diversity (heterozygosity or inbreeding  
232 coefficient) was observed between hatchery and natural origin salmon, hence not  
233 supporting the hypothesis of increased probability of inbreeding depression in hatchery  
234 fish for the populations we studied. Finally, we found no evidence of either large effect or  
235 polygenic selection acting between hatchery and wild samples when using either a standard  
236 genome scan approach or statistical framework appropriate for investigating effect of weak  
237 selection in multiple regions of the genome. Therefore, our work corroborates recent  
238 findings on juvenile Steelhead Trout (*Oncorhynchus mykiss*) showing that only a single  
239 generation in captivity induced differences on the expression of hundreds of genes in  
240 offspring reared in identical environments, without a noticeable overall genetic difference  
241 ( $F_{st}=0.008$ ; [3]).

242

243           In contrast to the apparent absence of significant genetic differences, our results  
244 revealed highly significant differences in methylation profiles between hatchery and natural  
245 origin salmon that were as pronounced as those observed between populations from  
246 different rivers. Our results differ from a study that compared hatchery-born and wild  
247 Steelhead Trout where no significant difference in methylation profiles was observed [12].  
248 It may be that the impact of rearing environment on epigenetic modifications differs among  
249 species. It also may be that the negative result for trout was due to the lower resolution of  
250 the method available at that time, and indeed, the authors suggested that limited epigenetic  
251 differences between hatchery and wild fish could not be ruled out [12]. With a different  
252 approach offering substantial increase in genomic resolution, we found evidence for a  
253 highly significant effect of hatchery-rearing on DNA methylation profiles in many regions of  
254 the Coho Salmon epigenome, when controlling for population structure. Moreover, our  
255 results revealed that the same epigenetic modifications developed in parallel between the  
256 two independent study systems.

257           In Coho Salmon, it has been shown that hatchery fish are not as efficient as wild fish  
258 for rapid seawater acclimation[15]. In addition, acclimation to seawater induces profound,  
259 yet transient, changes in methylation levels in Brown Trout (*Salmo trutta* L.)[31]. We  
260 showed that genomic regions demonstrating differential methylation profiles between  
261 hatchery and wild salmon in both rivers were enriched for ion homeostasis and control of  
262 body fluid levels functions, adding growing evidence that hatchery rearing may affect the  
263 osmoregulatory process during smoltification. For instance, the serine/threonine-protein

264 kinase (SGK2) is a potent stimulator of epithelial Na<sup>+</sup> channels [32]. Similarly, seawater  
265 acclimation is associated with the level of SGK1 expression (no SGK2 or SGK3 ortholog  
266 present in the killifish genome) in the killifish (*Fundulus heteroclistus*) [33]. Considering the  
267 fundamental role of these biological functions during the smoltification (physiological  
268 adaptation to seawater), and migration of parr salmonids to the ocean [34], we propose  
269 that hatchery-induced epigenetic modifications during early developmental stages could be  
270 partly responsible for the saltwater acclimation deficiency reported in previous studies  
271 [35]. Moreover, neuromuscular communication, through regulation of Ca<sup>2+</sup> levels, was  
272 among the biological functions showing the most pronounced differences between hatchery  
273 and natural origin salmon in both rivers. The enrichment was generally associated with a  
274 hypermethylation in hatchery fish, notably of a major regulator of motoneuron signal  
275 transmission through Ca<sup>2+</sup> levels (CAMK2). This observation strongly suggests an alteration  
276 of the neuromuscular communication that could reduce swimming performance as  
277 previously reported in hatchery-reared Coho Salmon [19]. Finally, although these results  
278 should be interpreted cautiously because they were limited to muscle tissue only, the  
279 enrichment for overall synaptic signal control functions raise the hypothesis that hatchery  
280 environment causes epigenetic modifications that may advocate a wealth of physiological  
281 and endocrinal differences. For instance, epigenetic differences we observed at some major  
282 neurological regulators such as HTR2C may play a role in the commonly observed  
283 behavioural differences between captive-reared and wild fish, such as increased  
284 aggressiveness, foraging, and boldness [30, 45–50]. This hypothesis could be tested by

285 comparing methylation profiles in the brain between fish with different aggressiveness,  
286 foraging and boldness characteristics [41].

## 287 **Conclusions and implication for conservation and management**

288 The reduced genome representation method used here and the fact that we could  
289 investigate only one tissue resulted in only a partial coverage of all possible epigenetic  
290 differences that may exist between hatchery and natural origin salmon. As such, our results  
291 should be interpreted as being conservative in reflecting the scale of epigenetic  
292 modifications incurred in the hatchery environment. Nevertheless, our results suggest that  
293 hatchery-rearing induces epigenetic variations that may alter the physiological (i.e. parr-to-  
294 smolt) transformation as well as the locomotor capacity that may result in reduced smolt  
295 fitness during juvenile seawater migration and ultimately, survival at sea. Whether or not  
296 the observed epigenetic modifications are inherited and be acted upon by natural selection  
297 cannot be answered from our results. Based on previous studies, it is reasonable to  
298 hypothesize that hatchery-induced epigenetic modifications during early developmental  
299 stages (post-fertilization and germ cell differentiation) almost certainly impact on lifelong  
300 phenotypic changes [42]. For conservation purposes, different practices in hatchery rearing  
301 are currently evaluated in order to circumvent the general observation that captive rearing  
302 reduces fitness in the wild. Alternative rearing practices may differ in environmental  
303 conditions (e.g. hatchery facilities or open lake), age at release (young fry or parr fish) or  
304 nutrition (supplemented or not by commercial food). For instance, previous work reported  
305 that salt-enriched food impact epigenetics and was correlated with a higher survival during  
15

306 sea transfer [31]. Clearly, improving our understanding of the dual role of genetic and  
307 epigenetic variation induced by captive rearing will contribute to development of the best  
308 practices for the management and conservation of salmonid fishes and possibly numerous  
309 other species that are managed through supplementation worldwide [43].

## 310 **Acknowledgements**

311 We thank L. Benestan, B. Bougas, B. Boyle, A.-M. Dion Côté, C. Hernandez, M. Krick and E.  
312 Normandeau for laboratory and bioinformatics support. We thank O. Bichet, A.-L. Ferchaud,  
313 J.-S. Moore, C. Robert, Q. Rougemont, C. Rougeux and B. Sutherland for their comments.  
314 Computations were carried out on the supercomputer Colosse, Université Laval, managed  
315 by Calcul Québec and Compute Canada and on local servers (Katak). This research was  
316 carried out in conjunction with EPIC4 (Enhanced Production in Coho: Culture, Community,  
317 Catch), a project supported by the government of Canada through Genome Canada, Genome  
318 British Columbia, and Genome Quebec. The authors declare no conflicts of interest.

## 319 **Data accessibility**

320 Sequences data are deposited on NCBI Short Read Archive database and will be made  
321 available upon acceptance (NCBI Bioproject: PRJNA389610).

## 322 **Authors contribution**

323 J.LL, L.B designed the experiment. J.LL and M.L. analyzed the data and wrote the paper with  
324 L.B. J.LL performed the laboratory work. T.B, R.W, K.K designed and conducted the  
325 sampling. B.F.K, J.S.L and E.R provided the prepublication reference genome and re-  
16



326 sequencing data. All co-authors contributed substantially to revisions.

## 327 **References**

- 328 1. Fraser, D.J. (2008). How well can captive breeding programs conserve biodiversity? A  
329 review of salmonids. *Evol. Appl.* *1*, 535–586.
- 330 2. Yeaman, S. (2015). Local Adaptation by Alleles of Small Effect. *Am. Nat.* *186*, S74–S89.
- 331 3. Christie, M.R., Marine, M.L., Fox, S.E., French, R.A., and Blouin, M.S. (2016). A single  
332 generation of domestication heritably alters the expression of hundreds of genes. *Nat.*  
333 *Commun.* *7*, 10676.
- 334 4. Christie, M.R., Marine, M.L., French, R.A., and Blouin, M.S. (2012). Genetic adaptation to  
335 captivity can occur in a single generation. *Proc. Natl. Acad. Sci.* *109*, 238–242.
- 336 5. Araki, H., Cooper, B., and Blouin, M.S. (2007). Genetic effects of captive breeding cause a  
337 rapid, cumulative fitness decline in the wild. *Science* *318*, 100–103.
- 338 6. Noakes, D.J., Beamish, R.J., and Kent, M.L. (2000). On the decline of Pacific salmon and  
339 speculative links to salmon farming in British Columbia. *Aquaculture* *183*, 363–386.
- 340 7. Irvine, J.R., and Fukuwaka, M. -A. (2011). Pacific salmon abundance trends and climate  
341 change. *ICES J. Mar. Sci.* *68*, 1122–1130.
- 342 8. Krkošek, M., Ford, J.S., Morton, A., Lele, S., Myers, R.A., and Lewis, M.A. (2007). Declining  
343 wild salmon populations in relation to parasites from farm salmon. *Science* *318*, 1772–  
344 1775.
- 345 9. Araki, H., and Schmid, C. (2010). Is hatchery stocking a help or harm?: Evidence,  
346 limitations and future directions in ecological and genetic surveys. *Aquaculture* *308*,  
347 *Supplement 1*, S2–S11.
- 348 10. Kawashima, T., and Berger, F. (2014). Epigenetic reprogramming in plant sexual  
349 reproduction. *Nat. Rev. Genet.* *15*, 613–624.
- 350 11. Kota, S.K., and Feil, R. (2010). Epigenetic transitions in germ cell development and  
351 meiosis. *Dev. Cell* *19*, 675–686.
- 352 12. Blouin, M.S., Thuillier, V., Cooper, B., Amarasinghe, V., Cluzel, L., Araki, H., and Grunau, C.  
353 (2010). No evidence for large differences in genomic methylation between wild and  
354 hatchery steelhead (*Oncorhynchus mykiss*). *Can. J. Fish. Aquat. Sci.* *67*, 217–224.

- 355 13. Legendre, P., and Legendre, L. (2012). Numerical Ecology, Volume 24 - 3rd Edition  
356 (Elsevier).
- 357 14. Kim, J.-H., Leong, J.S., Koop, B.F., and Devlin, R.H. (2016). Multi-tissue transcriptome  
358 profiles for coho salmon (*Oncorhynchus kisutch*), a species undergoing rediploidization  
359 following whole-genome duplication. *Mar. Genomics* 25, 33-37.
- 360 15. McDonald, D.G., Milligan, C.L., McFarlane, W.J., Croke, S., Currie, S., Hooke, B., Angus, R.B.,  
361 Tufts, B.L., and Davidson, K. (1998). Condition and performance of juvenile Atlantic  
362 salmon (*Salmo salar*): effects of rearing practices on hatchery fish and comparison with  
363 wild fish. *Can. J. Fish. Aquat. Sci.* 55, 1208–1219.
- 364 16. Martinez-Pena y Valenzuela, I., Mouslim, C., and Akaaboune, M. (2010).  
365 Calcium/Calmodulin Kinase II-dependent AChR Cycling at the Mammalian  
366 Neuromuscular Junction in Vivo. *J. Neurosci. Off. J. Soc. Neurosci.* 30, 12455–12465.
- 367 17. Rose, A.J., Kiens, B., and Richter, E.A. (2006). Ca<sup>2+</sup>-calmodulin-dependent protein  
368 kinase expression and signalling in skeletal muscle during exercise. *J. Physiol.* 574, 889–  
369 903.
- 370 18. Rose, A.J., Frøsig, C., Kiens, B., Wojtaszewski, J.F.P., and Richter, E.A. (2007). Effect of  
371 endurance exercise training on Ca<sup>2+</sup>-calmodulin-dependent protein kinase II  
372 expression and signalling in skeletal muscle of humans. *J. Physiol.* 583, 785–795.
- 373 19. Brauner, C.J., Iwama, G.K., and Randall, D.J. (1994). The effect of short-duration seawater  
374 exposure on the swimming performance of wild and hatchery-reared juvenile Coho  
375 Salmon (*Oncorhynchus kisutch*) during smoltification. *Can. J. Fish. Aquat. Sci.* 51, 2188–  
376 2194.
- 377 20. Pedersen, L.-F., Koed, A., and Malte, H. (2008). Swimming performance of wild and  
378 F1-hatchery-reared Atlantic salmon (*Salmo salar*) and brown trout (*Salmo trutta*)  
379 smolts. *Ecol. Freshw. Fish* 17, 425–431.
- 380 21. Pérez Maceira, J.J., Mancebo, M.J., and Aldegunde, M. (2014). The involvement of 5-HT-  
381 like receptors in the regulation of food intake in rainbow trout (*Oncorhynchus mykiss*).  
382 *Comp. Biochem. Physiol. Part C Toxicol. Pharmacol.* 161, 1–6.
- 383 22. Roelofs, D., Morgan, J., and Stürzenbaum, S. (2010). The significance of genome-wide  
384 transcriptional regulation in the evolution of stress tolerance. *Evol. Ecol.* 24, 527–539.
- 385 23. Foll, M., and Gaggiotti, O. (2008). A genome-scan method to identify selected loci  
386 appropriate for both dominant and codominant markers: A bayesian perspective.  
387 *Genetics* 180, 977–993.

- 388 24. Meirmans, P.G., and Van Tienderen, P.H. (2004). genotype and genodive: two programs  
389 for the analysis of genetic diversity of asexual organisms. *Mol. Ecol. Notes* 4, 792–794.
- 390 25. Laporte, M., Pavey, S.A., Rougeux, C., Pierron, F., Lauzent, M., Budzinski, H., Labadie, P.,  
391 Geneste, E., Couture, P., Baudrimont, M., *et al.* (2016). RAD sequencing reveals within-  
392 generation polygenic selection in response to anthropogenic organic and metal  
393 contamination in North Atlantic Eels. *Mol. Ecol.* 25, 219–237.
- 394 26. Pavey, S.A., Gaudin, J., Normandeau, E., Dionne, M., Castonguay, M., Audet, C., and  
395 Bernatchez, L. (2015). RADsequencing highlights polygenic discrimination of habitat  
396 ecotypes in the panmictic American Eel. *Curr. Biol.* 25, 1666–1671.
- 397 27. Briec, M.S.O., Ono, K., Drinan, D.P., and Naish, K.A. (2015). Integration of Random  
398 Forest with population-based outlier analyses provides insight on the genomic basis  
399 and evolution of run timing in Chinook salmon (*Oncorhynchus tshawytscha*). *Mol. Ecol.*  
400 24, 2729–2746.
- 401 28. Araki, H., Berejikian, B.A., Ford, M.J., and Blouin, M.S. (2008). Fitness of hatchery-reared  
402 salmonids in the wild. *Evol. Appl.* 1, 342–355.
- 403 29. Mäkinen, H., Vasemägi, A., McGinnity, P., Cross, T.F., and Primmer, C.R. (2015).  
404 Population genomic analyses of early-phase Atlantic Salmon (*Salmo salar*)  
405 domestication/captive breeding. *Evol. Appl.* 8, 93–107.
- 406 30. Artemov, A.V., Mague, N.S., Rastorguev, S.M., Zhenilo, S., Mazur, A.M., Tsygankova, S.V.,  
407 Boulygina, E.S., Kaplun, D., Nedoluzhko, A.V., Medvedeva, Y.A., *et al.* (2017). Genome-  
408 wide DNA methylation profiling reveals epigenetic adaptation of stickleback to marine  
409 and freshwater conditions. *Mol. Biol. Evol.* *In press*.
- 410 31. Morán, P., Marco-Rius, F., Megías, M., Covelo-Soto, L., and Pérez-Figueroa, A. (2013).  
411 Environmental induced methylation changes associated with seawater adaptation in  
412 brown trout. *Aquaculture* 392–395, 77–83.
- 413 32. Friedrich, B., Feng, Y., Cohen, P., Risler, T., Vandewalle, A., Bröer, S., Wang, J., Pearce, D.,  
414 and Lang, F. (2003). The serine/threonine kinases SGK2 and SGK3 are potent  
415 stimulators of the epithelial Na<sup>+</sup> channel  $\alpha,\beta,\gamma$ -ENaC. *Pflüg. Arch - Eur. J. Physiol.* 445,  
416 693–696.
- 417 33. Shaw, J., Sato, D., VanderHeide, J., LaCasse, T., Stanton, C., Lankowski, A., Stanton, S.,  
418 Chapline, C., Coutermarsh, B., Barnaby, R., *et al.* (2008). The Role of SGK and CFTR in  
419 Acute Adaptation to Seawater in *Fundulus Heteroclitus*. *Cell. Physiol. Biochem.* 22, 069–  
420 078.

- 421 34. Boeuf, G. (1993). Salmonid smolting: a pre-adaptation to the oceanic environment. In  
422 Fish Ecophysiology Chapman & Hall Fish and Fisheries Series., J. C. Rankin and F. B.  
423 Jensen, eds. (Springer Netherlands), pp. 105–135.
- 424 35. Shrimpton, J.M., Bernier, N.J., Iwama, G.K., and Randall, D.J. (1994). Differences in  
425 measurements of smolt development between wild and hatchery-reared juvenile coho  
426 salmon (*Oncorhynchus kisutch*) before and after saltwater exposure. Can. J. Fish. Aquat.  
427 Sci. *51*, 2170–2178.
- 428 36. Olla, B.L., Davis, M.W., and Ryer, C.H. (1998). Understanding how the Hatchery  
429 Environment Represses or Promotes the Development of Behavioral Survival Skills.  
430 Bull. Mar. Sci. *62*, 531–550.
- 431 37. Brown, C., and Laland, K. (2001). Social learning and life skills training for hatchery  
432 reared fish. J. Fish Biol. *59*, 471–493.
- 433 38. Álvarez, D., and Nicieza, A.G. (2003). Predator avoidance behaviour in wild and  
434 hatchery-reared brown trout: the role of experience and domestication. J. Fish Biol. *63*,  
435 1565–1577.
- 436 39. Metcalfe, N.B., Valdimarsson, S.K., and Morgan, I.J. (2003). The relative roles of  
437 domestication, rearing environment, prior residence and body size in deciding  
438 territorial contests between hatchery and wild juvenile salmon. J. Appl. Ecol. *40*, 535–  
439 544.
- 440 40. Sundström, L.F., and Johnsson, J.I. (2001). Experience and social environment influence  
441 the ability of young brown trout to forage on live novel prey. Anim. Behav. *61*, 249–255.
- 442 41. Aubin-Horth, N., Landry, C.R., Letcher, B.H., and Hofmann, H.A. (2005). Alternative life  
443 histories shape brain gene expression profiles in males of the same population. Proc. R.  
444 Soc. Lond. B Biol. Sci. *272*, 1655–1662.
- 445 42. Johnson, L.J., and Tricker, P.J. (2010). Epigenomic plasticity within populations: its  
446 evolutionary significance and potential. Heredity *105*, 113–121.
- 447 43. Laikre, L., Schwartz, M.K., Waples, R.S., and Ryman, N. (2010). Compromising genetic  
448 diversity in the wild: unmonitored large-scale release of plants and animals. Trends  
449 Ecol. Evol. *25*, 520–529.

450

## 451 **Supporting Material**

452 Appendix 1: Supplementary experimental procedures, figures S1-S4 and tables S1-S3

## 453 **Figure legends**

454 **Figure 1: Distance-base redundancy analysis (db-RDA) performed on the DNA**  
455 **methylation levels of 131,807 1000-bp sliding window regions for each individual**  
456 **(n=39).** Symbols represent rivers: Capilano (circle) and Quinsam (square). Colors  
457 represent rearing environment: hatchery (blue) and wild (yellow). The db-RDA was  
458 globally significant and explained 16% of all DNA methylation regions variation  
459 (adj.R<sup>2</sup>=0.16). River of origin and rearing environment both significantly explained 8% of  
460 the variation after controlling for each other with subsequent partial db-RDAs. Asterisks  
461 represent p-value < 0.01 (\*\*) and p-value < 0.05 (\*) related to the explanatory factors.

462 **Figure 2: Circos plot of differentially methylated regions between hatchery and wild**  
463 **fish.** Only the chromosomes (n = 27) and scaffolds (n =20) containing differentially  
464 methylated regions are plotted. Barplots represent hypermethylated regions (red) and  
465 hypomethylated regions (blue) in hatchery fish. Only annotated regions (blastx e-value <  
466 10<sup>-6</sup>) are represented.

467 **Figure 3: Distance-base redundancy analysis (db-RDA) performed on the total**  
468 **filtered 15,044 SNPs identified.** Symbols represent rivers: Capilano (circle) and Quinsam  
469 (square). Colors represent captivity treatment: hatchery (blue) and wild (yellow). The db-  
470 RDA was globally significant and explained 18% of all SNPs variation (adj.R<sup>2</sup>=0.18). River of  
21

471 origin and sex explained significantly 16% and 2% of the variation after controlling for each  
472 other with subsequent partial db-RDAs. Asterisks represent p-value<0.001 (\*\*\*) and p-  
473 value<0.05 (\*) related to the explanatory factors.

474

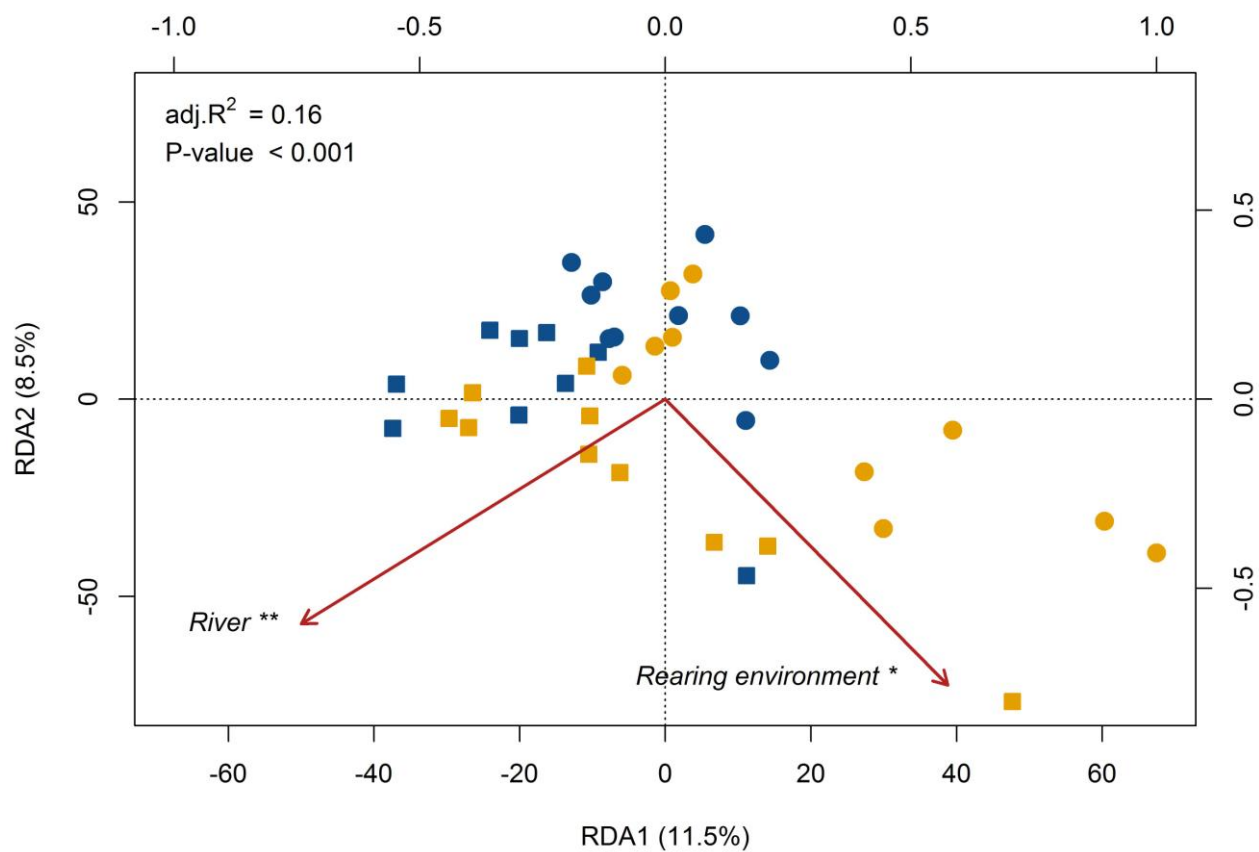

475

476

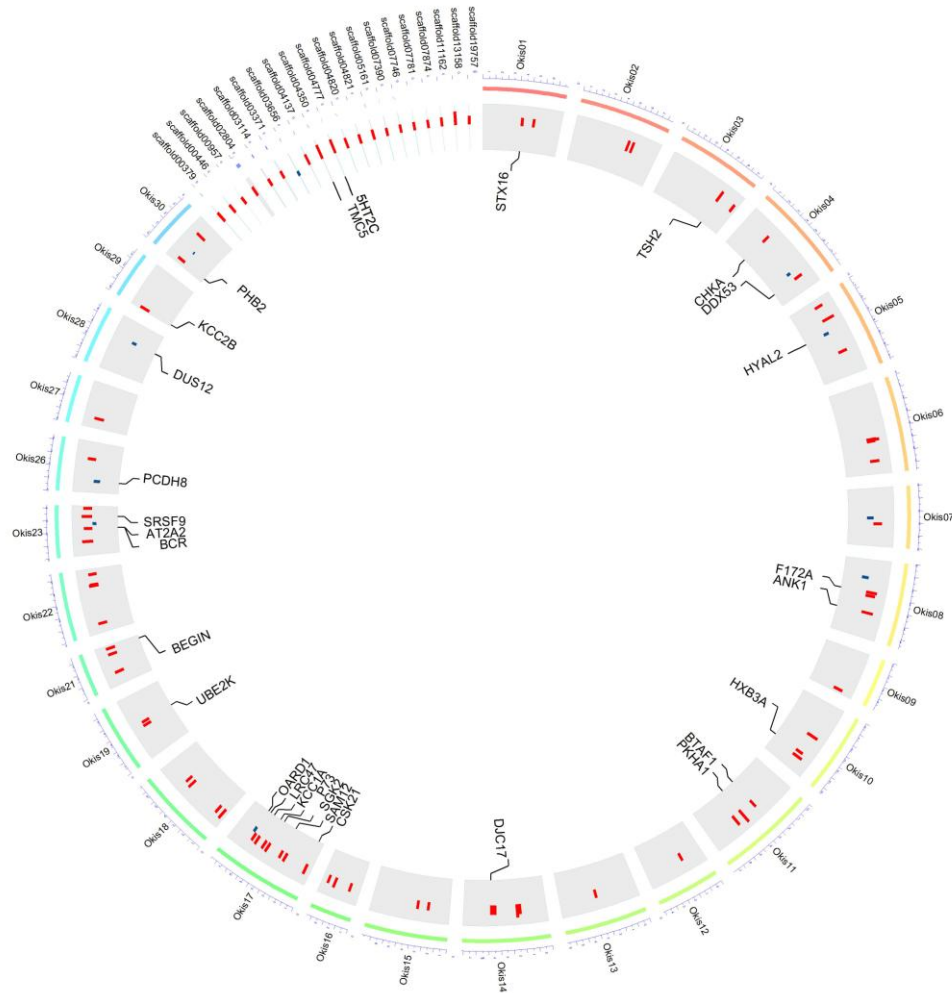

477



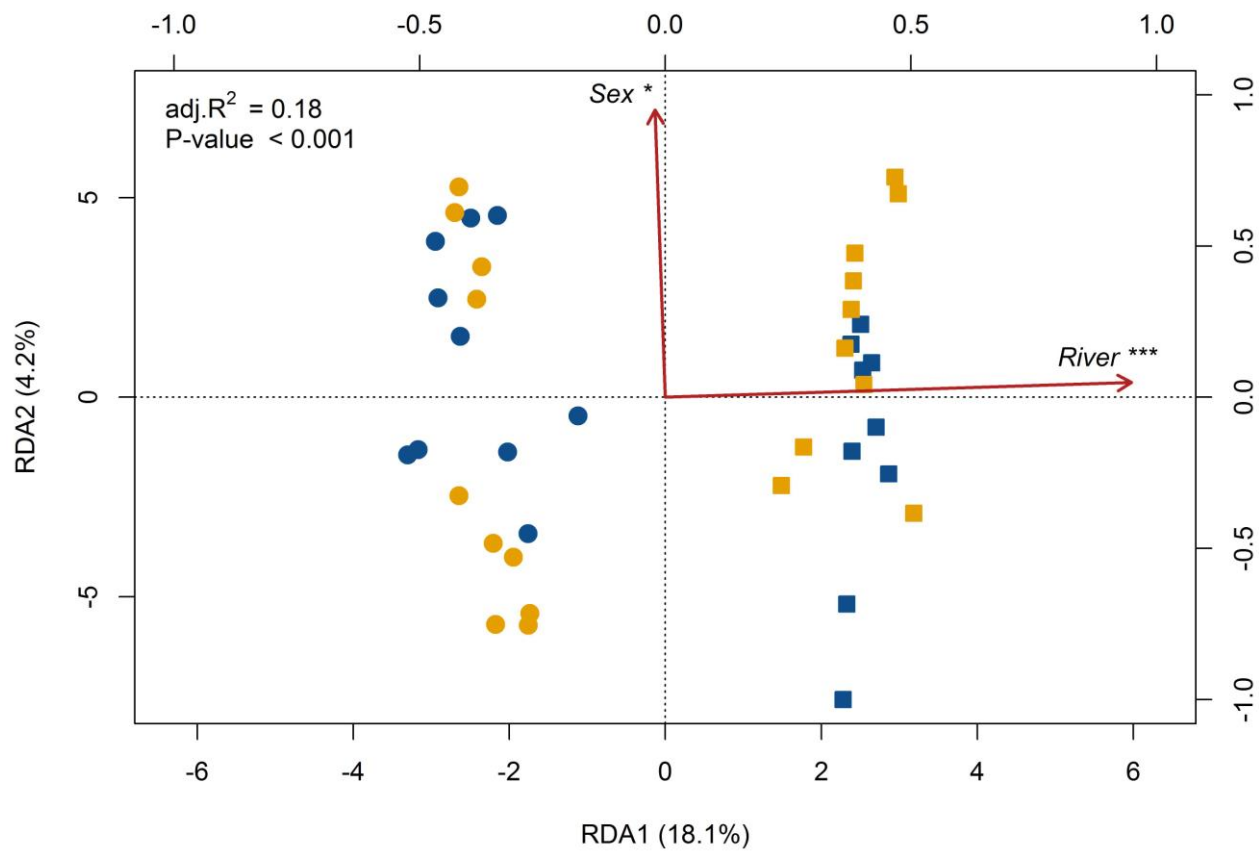

478

479

480 Table 1: Differentially methylated regions (DMRs) and their association with Uniprot  
 481 entries between hatchery and wild smolt Coho Salmon. Annotation was based on a blastx  
 482 approach against Uniprot-Swissprot database (e-value<10<sup>-6</sup>). Only significant DMRs were  
 483 included (methylation difference between hatchery and wild (Meth. diff.) >15%; q-value<  
 484 0.01). Positive values are associated with hypermethylation relative to natural origin  
 485 salmon. Transcript IDs correspond to the multi-tissue reference transcriptome for the Coho  
 486 Salmon [14]. Each region represents a 1000 bp portion of one of the 30 chromosomes  
 487 (Okis; Chr.) or additional scaffolds (scaffold; Scaff.) from the draft Coho Salmon genome  
 488 assembly (GenBank assembly accession: GCA\_002021735.1).

| Symbol | Uniprot ID | Transcript ID  | Gene name                                           | Chr. / Scaff. | Met. diff. |
|--------|------------|----------------|-----------------------------------------------------|---------------|------------|
| 5HT2C  | Q5IS66     | GDQG01000256.1 | 5-hydroxytryptamine receptor 2C                     | scaffold04777 | 23.3       |
| ANK1   | Q02357     | GDQG01029546.1 | Ankyrin-1                                           | Okis08        | 21.1       |
| AT2A2  | Q03669     | GDQG01041157.1 | Sarcoplasmic/endoplasmic reticulum calcium ATPase 2 | Okis23        | 15.7       |
| BCR    | P11274     | GDQG01010189.1 | Breakpoint cluster region protein                   | Okis23        | 15.7       |
| BCR    | Q6PAJ1     | GDQG01010373.1 | Breakpoint cluster region protein                   | Okis23        | 15.7       |
| BEGIN  | Q9BUH8     | GDQG01032671.1 | Brain-enriched guanylate kinase-associated protein  | Okis21        | 17.3       |
| BTAF1  | O14981     | GDQG01038303.1 | TATA-binding protein-associated factor 172          | Okis11        | 15.6       |
| BTAF1  | O14981     | GDQG01038304.1 | TATA-binding protein-associated factor 172          | Okis11        | 15.6       |
| CHKA   | P35790     | GDQG01024040.1 | Choline kinase alpha                                | Okis04        | 15.6       |
| CSK21  | Q60737     | GDQG01021514.1 | Casein kinase II subunit alpha                      | Okis17        | 19.6       |
| DDX53  | Q86TM3     | GDQG01005021.1 | Probable ATP-dependent RNA helicase DDX53           | Okis04        | 16.1       |
| DJC17  | Q91WT4     | GDQG01018295.1 | DnaJ homolog subfamily C member 17                  | Okis14        | 17.3       |
| DUS12  | Q9UNI6     | GDQG01021214.1 | Dual specificity protein phosphatase 12             | Okis28        | -18.9      |

|         |         |                |                                                                  |               |       |
|---------|---------|----------------|------------------------------------------------------------------|---------------|-------|
| F172A   | Q7T297  | GDQG01019163.1 | Protein FAM172A                                                  | Okis08        | 20.3  |
| HXB3A   | O42368  | GDQG01036924.1 | Homeobox protein Hox-B3a                                         | Okis10        | 15.2  |
| HYAL2   | Q12891  | GDQG01026988.1 | Hyaluronidase-2                                                  | Okis05        | -17.6 |
| HYAL2   | Q12891  | GDQG01026990.1 | Hyaluronidase-2                                                  | Okis05        | -17.6 |
| HYAL2   | Q12891  | GDQG01026993.1 | Hyaluronidase-2                                                  | Okis05        | -17.6 |
| HYAL2   | Q12891  | GDQG01027002.1 | Hyaluronidase-2                                                  | Okis05        | -17.6 |
| KCC1A   | Q63450  | GDQG01026516.1 | Calcium/calmodulin-dependent protein kinase type 1               | Okis17        | 17.9  |
| KCC2B   | P28652  | GDQG01028157.1 | Calcium/calmodulin-dependent protein kinase type II subunit beta | Okis29        | 18.9  |
| LRC47   | Q505F5  | GDQG01001482.1 | Leucine-rich repeat-containing protein 47                        | Okis17        | 15.6  |
| OARD1   | Q9Y530  | GDQG01002423.1 | O-acetyl-ADP-ribose deacetylase 1                                | Okis17        | -17.1 |
| P73     | Q9XSK8  | GDQG01009063.1 | Tumor protein p73                                                | Okis17        | 17.5  |
| PCDH8   | O95206  | GDQG01028291.1 | Protocadherin-8                                                  | Okis26        | -15.9 |
| PHB2    | Q5XIH7  | GDQG01016094.1 | Prohibitin-2                                                     | Okis30        | 15.5  |
| PKHA1   | Q9HB21  | GDQG01013238.1 | Pleckstrin homology domain-containing family A member 1          | Okis11        | 27.7  |
| SAM12   | Q0VE29  | GDQG01021692.1 | Sterile alpha motif domain-containing protein 12                 | Okis17        | 15.1  |
| SGK2    | Q9HBY8  | GDQG01021555.1 | Serine/threonine-protein kinase Sgk2                             | Okis17        | 18.8  |
| SRSF9   | Q5PPI1  | GDQG01030164.1 | Serine/arginine-rich splicing factor 9                           | Okis23        | 19.2  |
| SRSF9   | Q5PPI1  | GDQG01030165.1 | Serine/arginine-rich splicing factor 9                           | Okis23        | 19.2  |
| STX16   | Q8BVI5  | GDQG01021767.1 | Syntaxin-16                                                      | Okis01        | 15.3  |
| TMC5    | Q6UXY8  | GDQG01032265.1 | Transmembrane channel-like protein 5                             | scaffold04350 | 27.4  |
| TSH2    | Q9NRE2  | GDQG01039096.1 | Teashirt homolog 2                                               | Okis03        | 22.2  |
| UBE2K   | P61087  | GDQG01019710.1 | Ubiquitin-conjugating enzyme E2 K                                | Okis19        | 15.3  |
| Unknown | Unknown | GDQG01000757.1 | Unknown                                                          | Okis07        | 15.6  |
| Unknown | Unknown | GDQG01002050.1 | Unknown                                                          | scaffold07390 | 15.2  |
| Unknown | Unknown | GDQG01003870.1 | Unknown                                                          | Okis21        | 17.3  |
| Unknown | Unknown | GDQG01005352.1 | Unknown                                                          | Okis19        | 16.5  |
| Unknown | Unknown | GDQG01007903.1 | Unknown                                                          | Okis04        | 16.1  |
| Unknown | Unknown | GDQG01008658.1 | Unknown                                                          | scaffold04821 | 18.0  |
| Unknown | Unknown | GDQG01009276.1 | Unknown                                                          | Okis13        | 15.6  |
| Unknown | Unknown | GDQG01009277.1 | Unknown                                                          | Okis13        | 15.6  |

|         |         |                |         |               |      |
|---------|---------|----------------|---------|---------------|------|
| Unknown | Unknown | GDQG01020612.1 | Unknown | scaffold03114 | 15.0 |
| Unknown | Unknown | GDQG01023154.1 | Unknown | Okis04        | 16.1 |
| Unknown | Unknown | GDQG01023155.1 | Unknown | Okis04        | 16.1 |
| Unknown | Unknown | GDQG01023157.1 | Unknown | Okis04        | 16.1 |
| Unknown | Unknown | GDQG01025110.1 | Unknown | Okis17        | 19.6 |
| Unknown | Unknown | GDQG01026416.1 | Unknown | scaffold04821 | 18.0 |
| Unknown | Unknown | GDQG01027613.1 | Unknown | scaffold00446 | 17.9 |
| Unknown | Unknown | GDQG01033116.1 | Unknown | scaffold04821 | 18.0 |
| Unknown | Unknown | GDQG01042549.1 | Unknown | scaffold02804 | 19.2 |

---

489

490
